# Supplementary figures and images for: Solvent-free synthesis of polysaccharide derivatives via heterogeneous Schiff base chemistry
Source: Royal Society of Chemistry journal article supplement (doi:10.1039/d2gc04828k), 2023-01-01

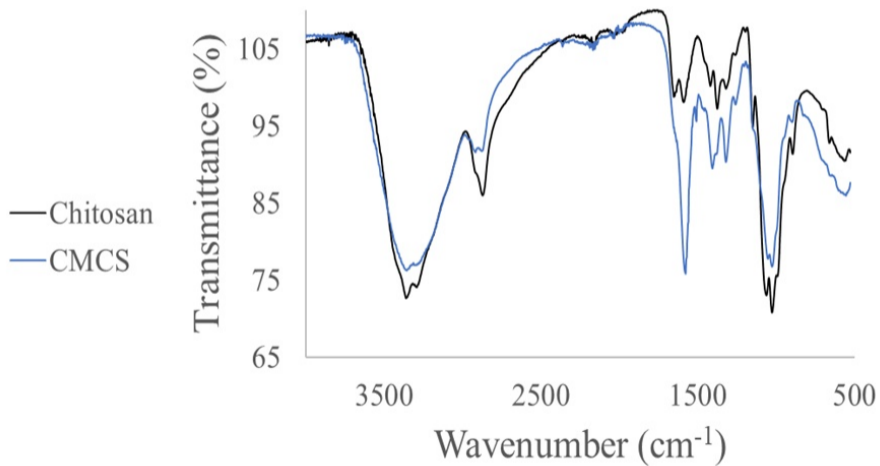

Supplement: d2gc04828k1.pdf [file d2gc04828k1.pdf]

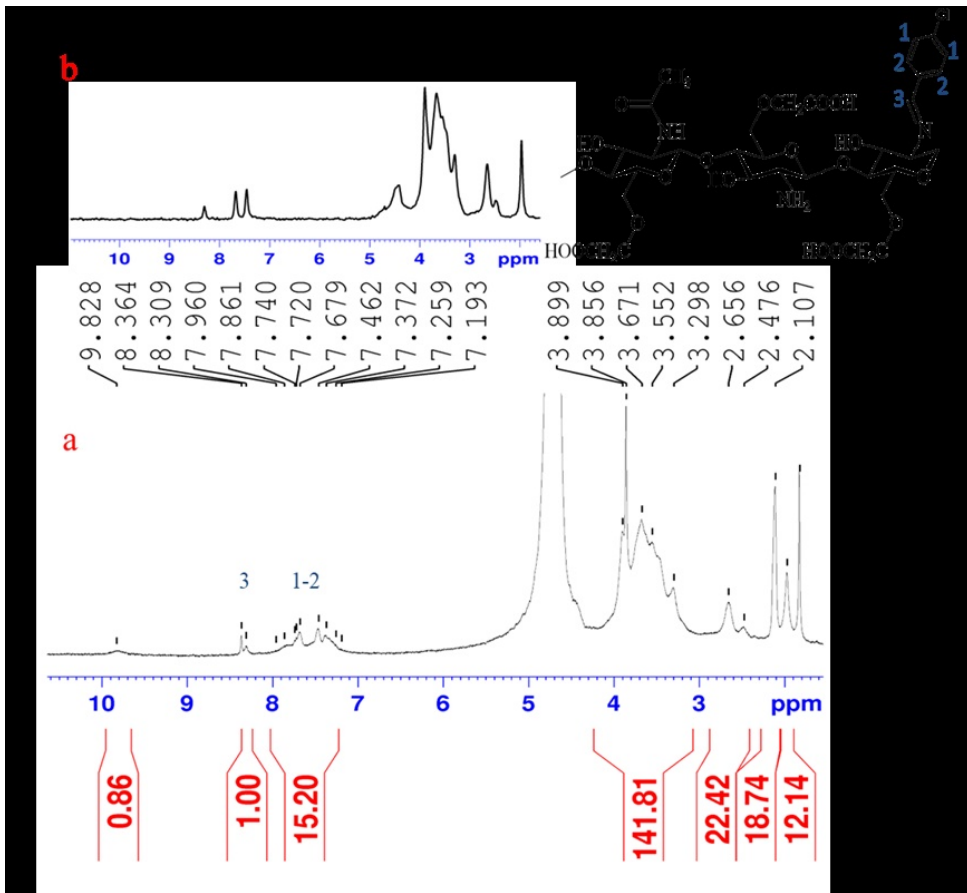

Supplement: d2gc04828k10.pdf [file d2gc04828k10.pdf]

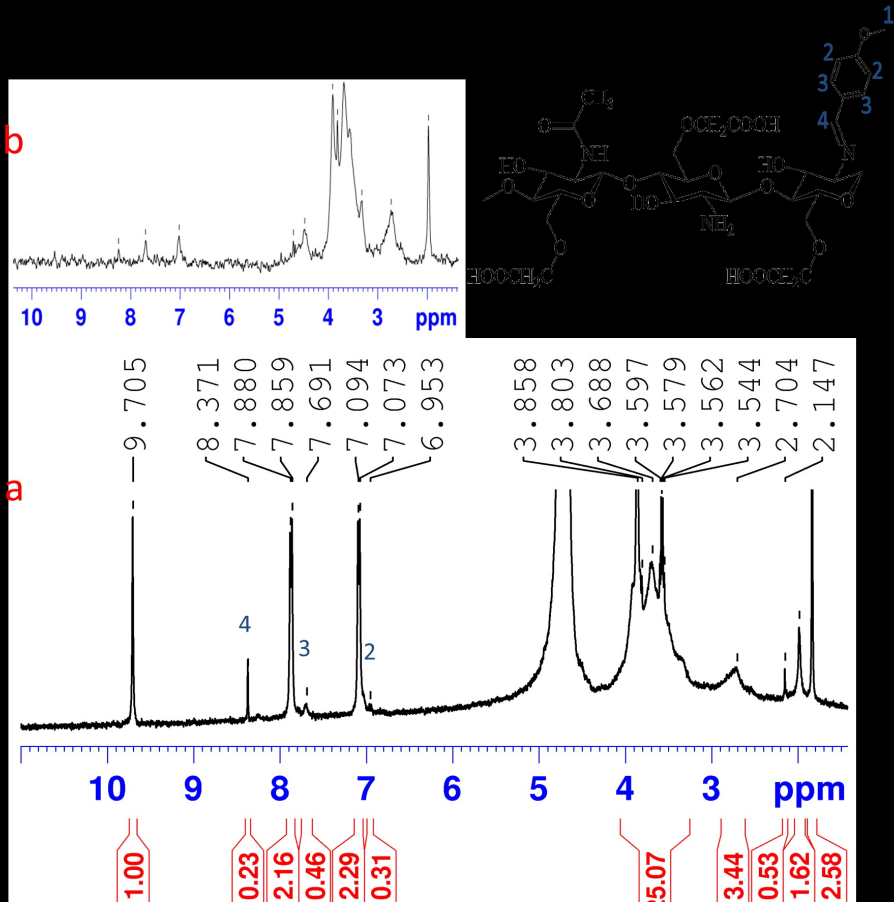

Supplement: d2gc04828k11.pdf [file d2gc04828k11.pdf]

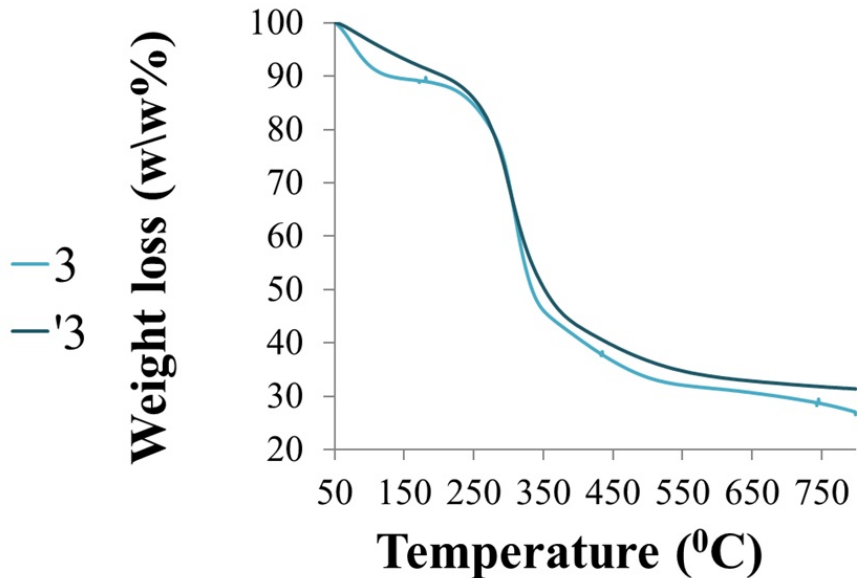

Supplement: d2gc04828k2.pdf [file d2gc04828k2.pdf]

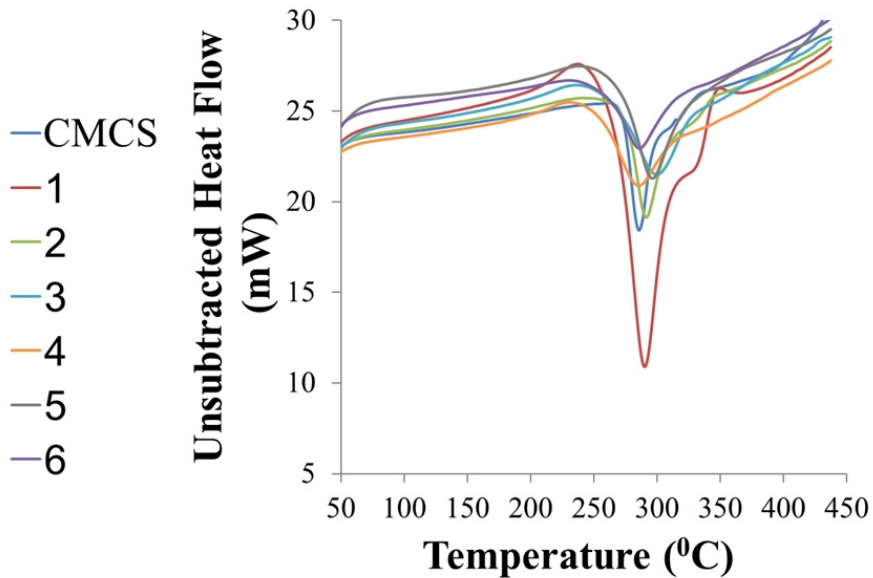

Supplement: d2gc04828k3.pdf [file d2gc04828k3.pdf]

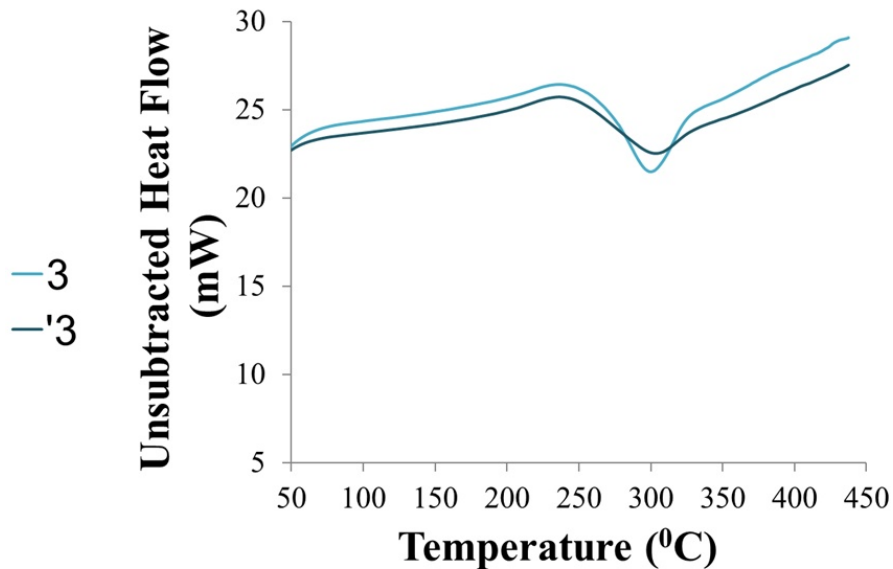

Supplement: d2gc04828k4.pdf [file d2gc04828k4.pdf]

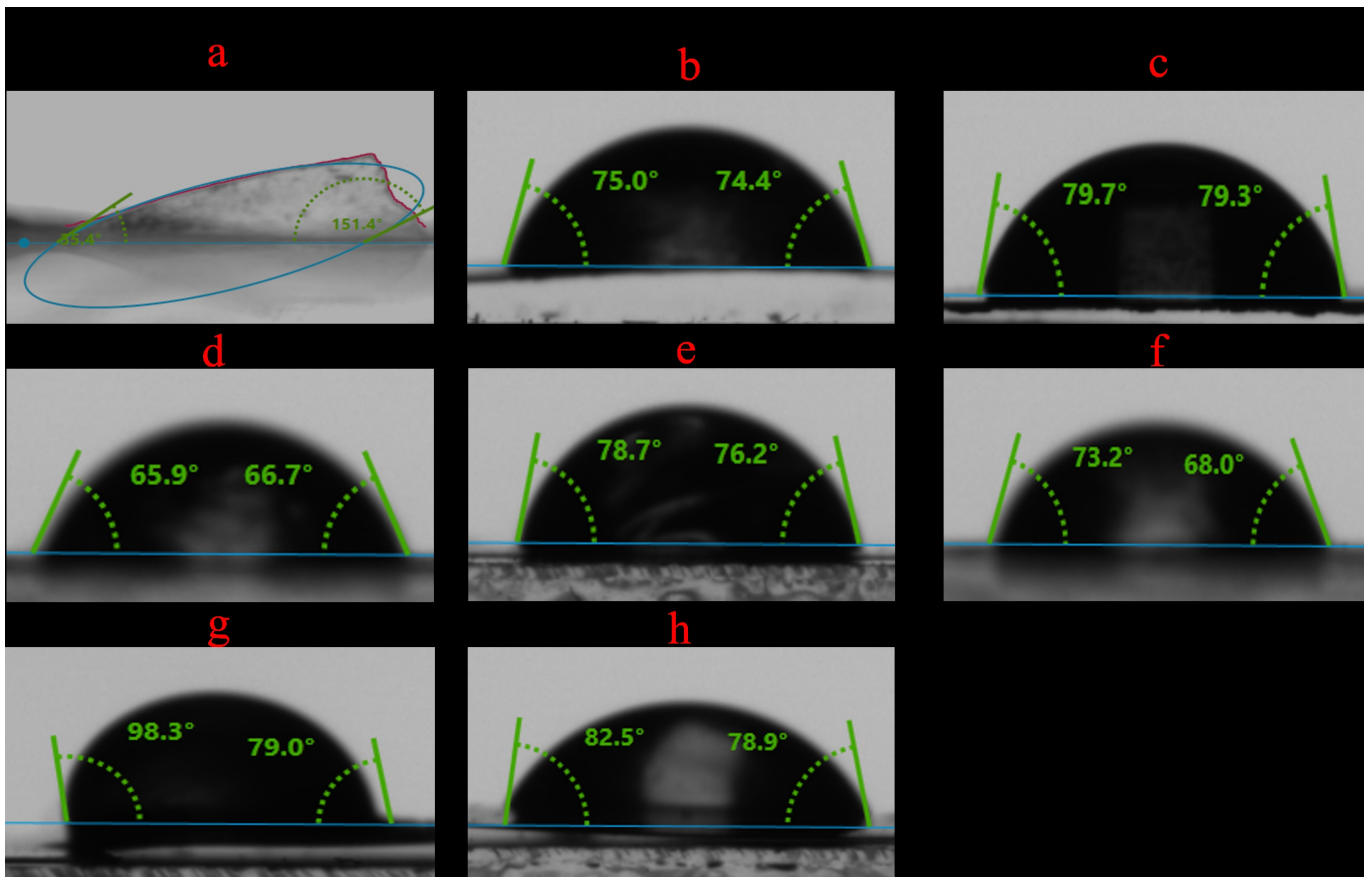

Supplement: d2gc04828k5.pdf [file d2gc04828k5.pdf]

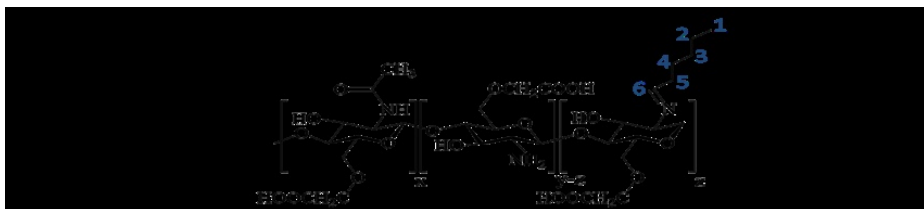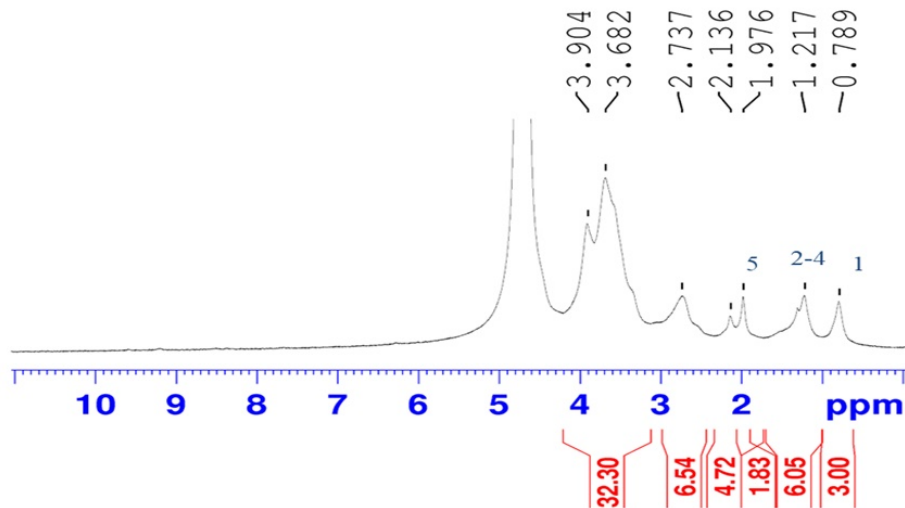

Supplement: d2gc04828k7.pdf [file d2gc04828k7.pdf]

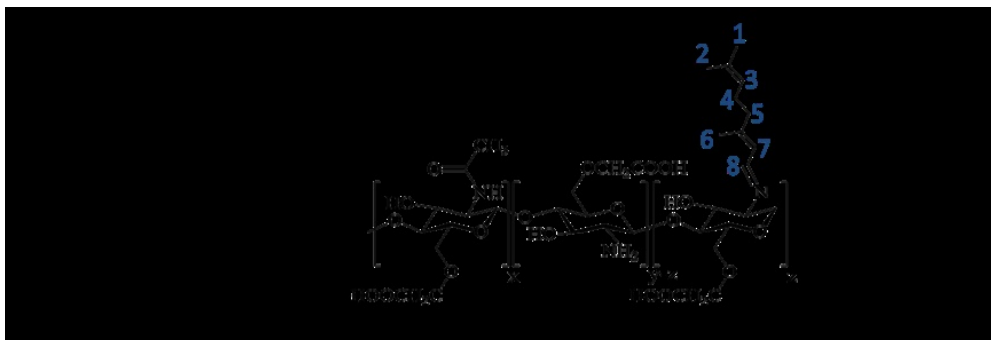

3.884  
3.645  
3.539  
3.296  
2.631  
2.463  
2.102  
1.954  
1.808  
1.582  
1.521

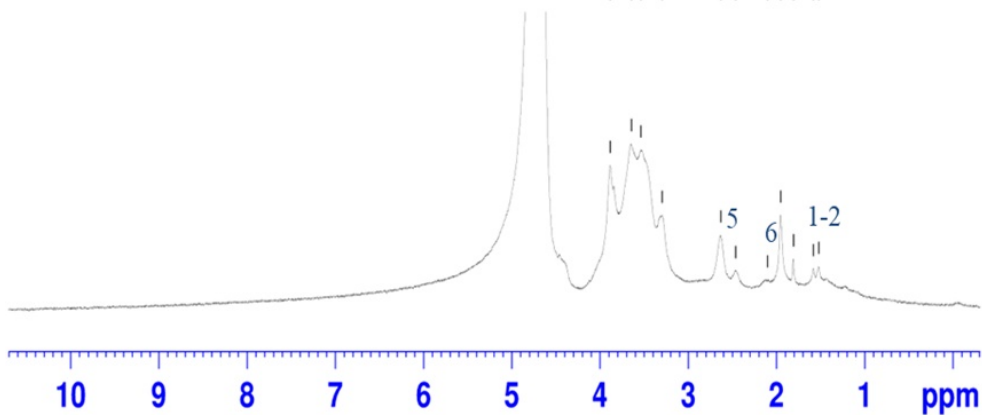

135.38

12.87

3.99

2.61

9.53

2.96

6.00

Supplement: d2gc04828k8.pdf [file d2gc04828k8.pdf]

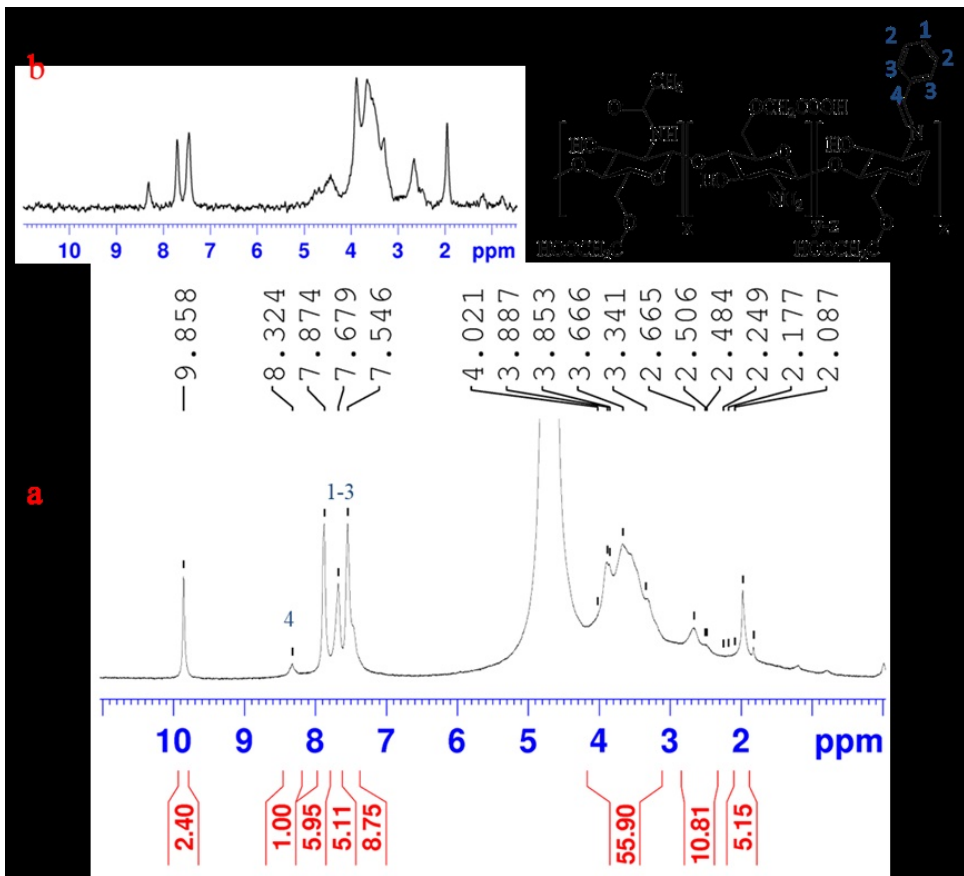

Supplement: d2gc04828k9.pdf [file d2gc04828k9.pdf]
